# Supplementary material for: Inter-rater agreement of the Quality of Life-Alzheimer’s Disease (QoL-AD) self-rating and proxy rating scale: secondary analysis of RightTimePlaceCare data
Source: Springer Nature journal article supplement (doi:10.1186/s12955-018-0959-y), 2018-06-28
Supplement: MOESM1 [file 15892234]

**Additional file 1:** Variables and measures from the RightTimePlaceCare study data set, based on factors associated with the level of agreement between self- and proxy ratings identified in the empirical literature

| Findings of the empirical literature           |         | Measurements of the RightTimePlaceCare study              |                               |                       |                                                                 |                                                                                                                                                                                                                                                                |                                                  |        |                                                                                                                                                                                                                                                                                                                                                |
|------------------------------------------------|---------|-----------------------------------------------------------|-------------------------------|-----------------------|-----------------------------------------------------------------|----------------------------------------------------------------------------------------------------------------------------------------------------------------------------------------------------------------------------------------------------------------|--------------------------------------------------|--------|------------------------------------------------------------------------------------------------------------------------------------------------------------------------------------------------------------------------------------------------------------------------------------------------------------------------------------------------|
| Factors associated with the level of agreement | Studies | Outcome                                                   | Measure/variable              | Subscales/ items      | Setting: rater                                                  | Value range                                                                                                                                                                                                                                                    | Interpretation                                   |        |                                                                                                                                                                                                                                                                                                                                                |
| People with dementia                           | 1.      | Behavioural and psychological symptoms of dementia (BPSD) | n = 5<br>[18, 20, 25, 28, 36] | Challenging behaviour | Neuropsychiatric Inventory Questionnaire (NPI-Q)<br>[49, 50]    | 12 items in 12 behavioural domains: delusions, hallucinations, agitation/aggression, depression/dysphoria, anxiety, euphoria, apathy, disinhibition, irritability, aberrant motor behaviour, sleep and night-time behaviour change, appetite and eating change | ILTC: professional carers<br>HC: informal carers | 0 – 36 | Higher scores indicate the presence of more (severe) neuropsychiatric symptoms                                                                                                                                                                                                                                                                 |
|                                                |         | Cognitive impairment or severity of dementia              | n = 5<br>[16, 17, 19, 25, 28] | Cognitive function    | Standardized Mini Mental-State Examination (S-MMSE)<br>[47, 51] | 30-item assessment of global cognitive function with domains such as orientation, concentration, attention, memory, recall and calculation                                                                                                                     | ILTC+HC: person with dementia or routine data    | 0 – 30 | Lower scores indicate severe cognitive impairment<br><br>Sometimes used as a surrogate method for the staging of dementia: severe=0–10, moderate=11–20, mild=21–25, questionable=26–29, no=30 [52]<br>→ However, cut-off points to assist in the diagnosis of dementia or to determine dementia severity should be interpreted cautiously [1]. |
|                                                | 2.      | Depression                                                | n = 3<br>[18–20]              | Depressive symptoms   | Cornell Scale for Depression in Dementia (CSDD)<br>[53]         | 19 items covering 5 dimensions: mood-related signs, behavioural disturbance, physical signs, cyclic functions, ideational disturbance                                                                                                                          | ILTC: professional carers<br>HC: informal carers | 0 – 38 | Higher scores indicate the presence of increased depressive symptoms<br><br>> 6 points: presence of considerable depressive symptoms                                                                                                                                                                                                           |

| Findings of the empirical literature           |         | Measurements of the RightTimePlaceCare study              |                           |                                                            |                                                                                         |                                                                                                                                                                                                                                                                                                                                                   |                                                  |                                                                                                                                                                                             |
|------------------------------------------------|---------|-----------------------------------------------------------|---------------------------|------------------------------------------------------------|-----------------------------------------------------------------------------------------|---------------------------------------------------------------------------------------------------------------------------------------------------------------------------------------------------------------------------------------------------------------------------------------------------------------------------------------------------|--------------------------------------------------|---------------------------------------------------------------------------------------------------------------------------------------------------------------------------------------------|
| Factors associated with the level of agreement | Studies | Outcome                                                   | Measure/variable          | Subscales/ items                                           | Setting: rater                                                                          | Value range                                                                                                                                                                                                                                                                                                                                       | Interpretation                                   |                                                                                                                                                                                             |
|                                                | 3.      | Functional status: independence                           | n = 2<br>[18, 28]         | Functional status                                          | Katz Index of Independence in Activities of Daily Living ( <b>KATZ ADL</b> ) [54]       | 6 activity domains: bathing, dressing, toileting, transferring, continence, feeding                                                                                                                                                                                                                                                               | ILTC: professional carers<br>HC: informal carers | 0 – 6<br><br>Higher scores indicate more independency in performing activities of daily living<br><br>6 points: independent, 3–5 points: moderate dependency, 0–2 points: severe dependency |
|                                                |         | Anosognosia                                               | n = 2<br>[19, 21]         | Not measured                                               |                                                                                         |                                                                                                                                                                                                                                                                                                                                                   |                                                  |                                                                                                                                                                                             |
|                                                |         | Quality of person with dementia-carer relationship        | n = 2<br>[17, 36]         | Not measured                                               |                                                                                         |                                                                                                                                                                                                                                                                                                                                                   |                                                  |                                                                                                                                                                                             |
|                                                |         | Educational background                                    | n = 2<br>[17, 20]         | Sociodemographic data: length of formal education (years)  |                                                                                         |                                                                                                                                                                                                                                                                                                                                                   | ILTC+HC: informal carers                         |                                                                                                                                                                                             |
|                                                | 4.      | Domestic environment/ person with dementia living at home | n = 1<br>[17]             | Sociodemographic data: care setting (HC vs. ILTC)          |                                                                                         |                                                                                                                                                                                                                                                                                                                                                   |                                                  |                                                                                                                                                                                             |
| <b>Carers</b>                                  | 1.      | Caregiver burden                                          | n = 4<br>[18, 22, 28, 36] | General caregiver burden                                   | Zarit Burden Inventory ( <b>ZBI</b> ) [55]                                              | 22 items covering 5 domains of general caregiver burden: burden in relationship, emotional wellbeing, social and family life, finances, loss of control over one's life                                                                                                                                                                           | ILTC+HC: informal carers                         | 0 – 88<br><br>Higher scores indicate higher perceived general caregiver burden                                                                                                              |
|                                                |         |                                                           |                           | Caregiver distress due to BPSD of the person with dementia | Neuropsychiatric Inventory Questionnaire-Caregiver Distress ( <b>NPI-Q-D</b> ) [49, 50] | 12 items in 12 behavioural domains of caregiver distress associated with symptoms of BPSD of the person with dementia: delusions, hallucinations, agitation/aggression, depression/dysphoria, anxiety, euphoria, apathy, disinhibition, irritability, aberrant motor behaviour, sleep and night-time behaviour change, appetite and eating change | HC only: informal carers                         | 0 – 60<br><br>Higher scores indicate higher caregiver distress related to BPSD of the person with dementia                                                                                  |

| Findings of the empirical literature           |                                                           | Measurements of the RightTimePlaceCare study                        |                                                            |                                                                                                                                  |                          |             |                                                                                                         |
|------------------------------------------------|-----------------------------------------------------------|---------------------------------------------------------------------|------------------------------------------------------------|----------------------------------------------------------------------------------------------------------------------------------|--------------------------|-------------|---------------------------------------------------------------------------------------------------------|
| Factors associated with the level of agreement | Studies                                                   | Outcome                                                             | Measure/variable                                           | Subscales/ items                                                                                                                 | Setting: rater           | Value range | Interpretation                                                                                          |
|                                                |                                                           | Reactions of informal carers to the care of chronically ill persons | Caregiver Reaction Assessment (CRA) [56]                   | Subscale: <b>CRA-Lack of family support</b>                                                                                      | ILTC+HC: informal carers | 5 – 25      | Higher scores indicate a more negative influence on carers' experience                                  |
| 2.                                             | Depression of the carer<br>n = 3<br>[17, 22]              | Not measured                                                        |                                                            |                                                                                                                                  |                          |             |                                                                                                         |
| 3.                                             | Quality of life of the carer<br>n = 2<br>[22, 36]         | Health-related quality of life                                      | European Quality of Life Scale (EQ-5D) [57, 58]            | <b>EQ-5D-3L</b><br>5 items about 5 health dimensions: mobility, self-care, usual activities, pain/discomfort, anxiety/depression | ILTC+HC: informal carers | -0,594 – 1  | Higher scores indicate better health-related quality of life                                            |
|                                                |                                                           | Psychological well-being                                            | General Health Questionnaire 12-item version (GHQ-12) [59] | 12 items                                                                                                                         | HC: informal carers      | 0 – 36      | Higher scores indicate a less psychological well-being                                                  |
|                                                |                                                           | Reactions of informal carers to the care of chronically ill persons | Caregiver Reaction Assessment (CRA) [56]                   | Subscale: <b>CRA-Impact on health</b>                                                                                            | ILTC+HC: informal carers | 4 – 20      | Higher scores indicate a more negative influence on carers' experience due to their own health problems |
| 4.                                             | Professional carer being a Primary Nurse<br>n = 1<br>[27] | Not measured                                                        |                                                            |                                                                                                                                  |                          |             |                                                                                                         |
|                                                | Kinship status<br>n = 1<br>[17]                           | Sociodemographic data: relationship to person with dementia         |                                                            |                                                                                                                                  | ILTC+HC: informal carers |             |                                                                                                         |

| Findings of the empirical literature           |                     | Measurements of the RightTimePlaceCare study |                               |                  |                          |             |                |
|------------------------------------------------|---------------------|----------------------------------------------|-------------------------------|------------------|--------------------------|-------------|----------------|
| Factors associated with the level of agreement | Studies             | Outcome                                      | Measure/variable              | Subscales/ items | Setting: rater           | Value range | Interpretation |
|                                                | Gender of the carer | n = 1 [19]                                   | Sociodemographic data: gender |                  | ILTC+HC: informal carers |             |                |
|                                                | Income of the carer | n = 1 [22]                                   | Not measured                  |                  |                          |             |                |

*ILTC*: institutional long-term nursing care; *HC*: professional home care.

All references mentioned in the table are cited in the ‘References’ section of the main publication.
