# Supplementary material for: Inter-rater agreement of the Quality of Life-Alzheimer’s Disease (QoL-AD) self-rating and proxy rating scale: secondary analysis of RightTimePlaceCare data
Source: Springer Nature journal article supplement (doi:10.1186/s12955-018-0959-y), 2018-06-28

## Additional file 2: Flow chart of study sample selection

---

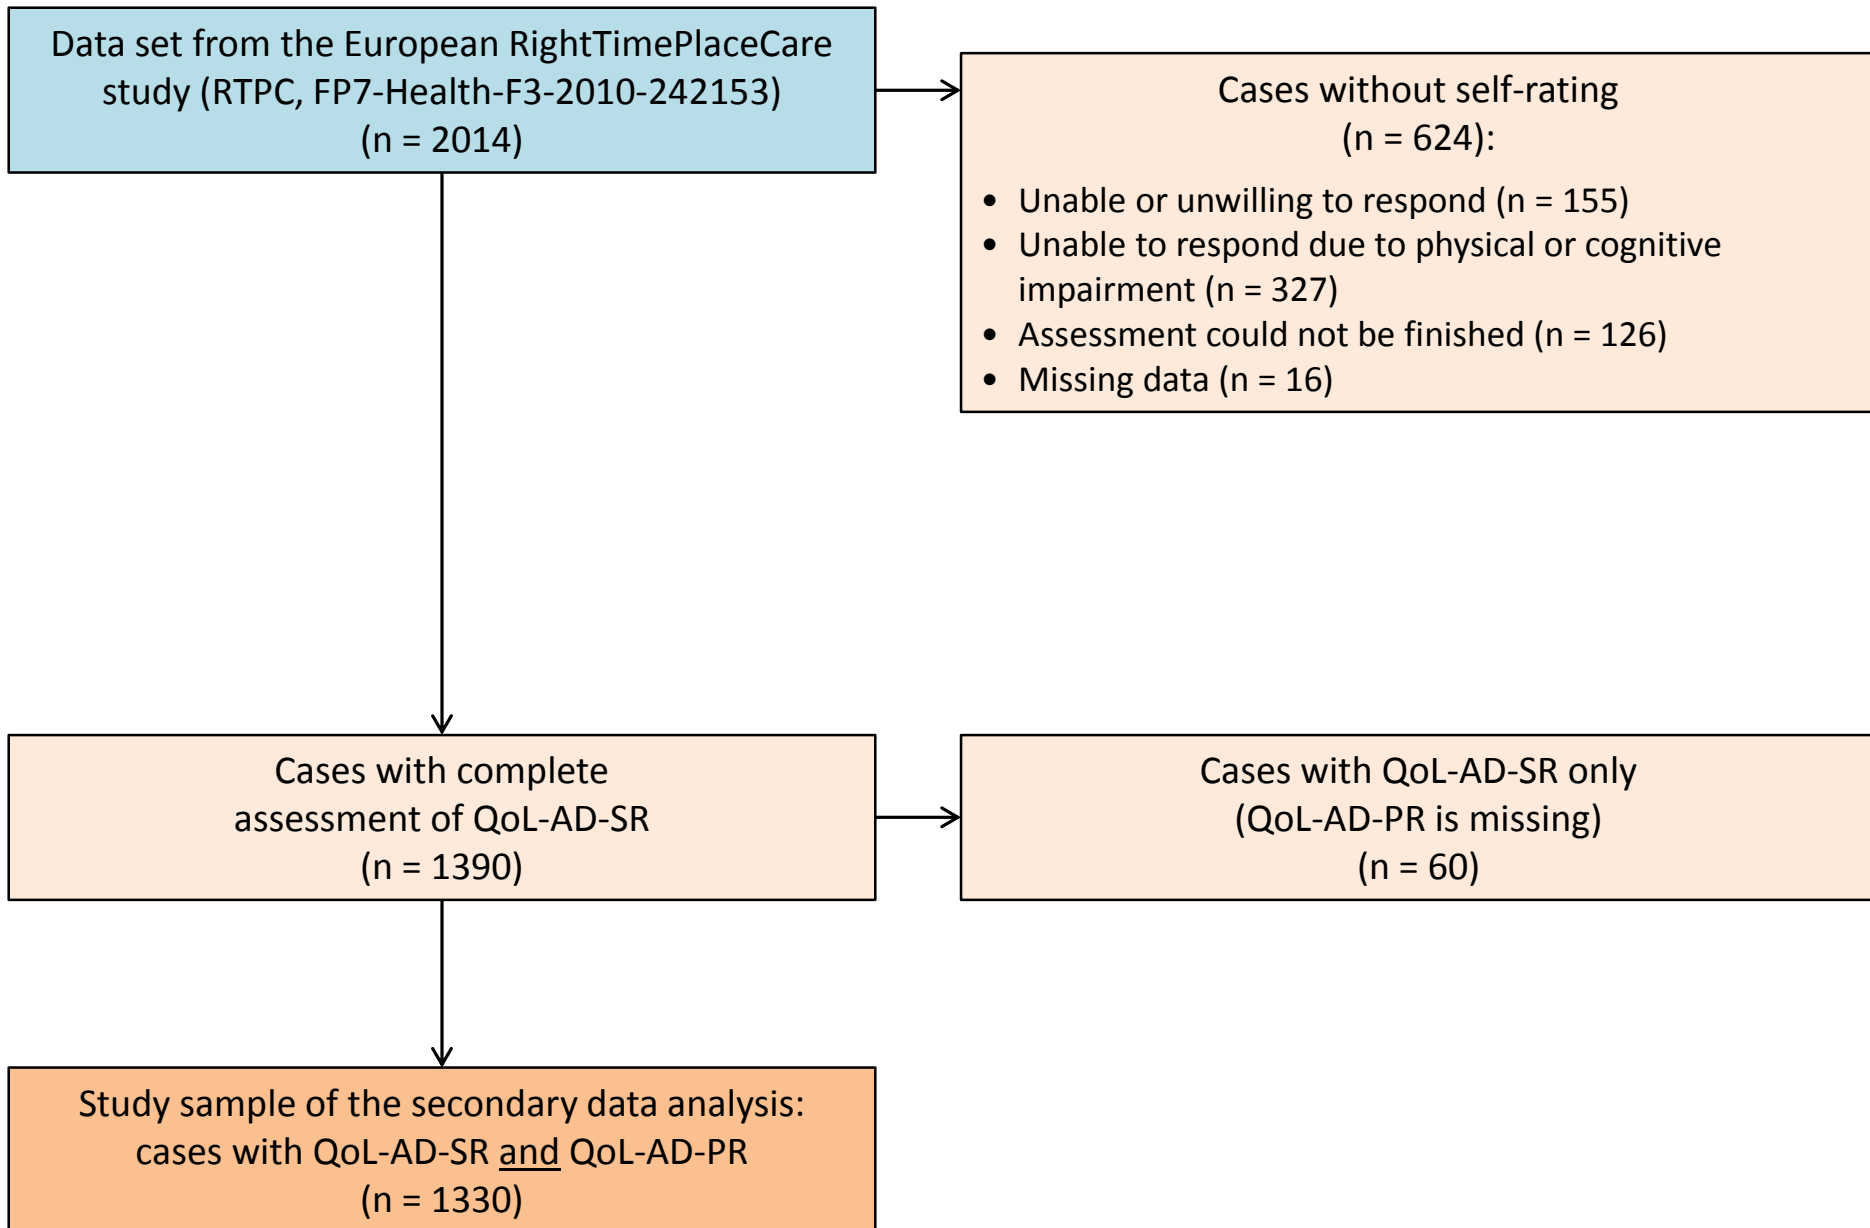

Supplement: MOESM2 [file 15892234]
